# Supplementary material
Source: publisher figshare collection journal article supplement (https://acs.figshare.com/ndownloader/files/4002742)
Supplement: Supplementary file 1 [file 4002742]

# An organic coprecipitation route to synthesize high voltage $\text{LiNi}_{0.5}\text{Mn}_{1.5}\text{O}_4$

*Jijun Feng*<sup>a, b, \*</sup>, *Zhipeng Huang*<sup>a</sup>, *Chao Guo*<sup>a</sup>, *Natasha A. Chernova*<sup>b</sup>, *Shailesh Upreti*<sup>b, c</sup>, *M.*

*Stanley Whittingham*<sup>b, \*</sup>

<sup>a</sup> Key Laboratory of Chemical Sensing & Analysis in Universities of Shandong, School of Chemistry and Chemical Engineering, University of Jinan, Jinan 250022, China

<sup>b</sup> Institute for Materials Research, State University of New York at Binghamton, Binghamton, New York 13902, USA

<sup>c</sup> Primet precision materials Inc., Ithaca, NY 14850, USA

## **Corresponding Author**

E-mail address: [chm\\_fengjj@ujn.edu.cn](mailto:chm_fengjj@ujn.edu.cn) (J. J. Feng).

E-mail address: [stanwhit@gmail.com](mailto:stanwhit@gmail.com) (M. S. Whittingham).

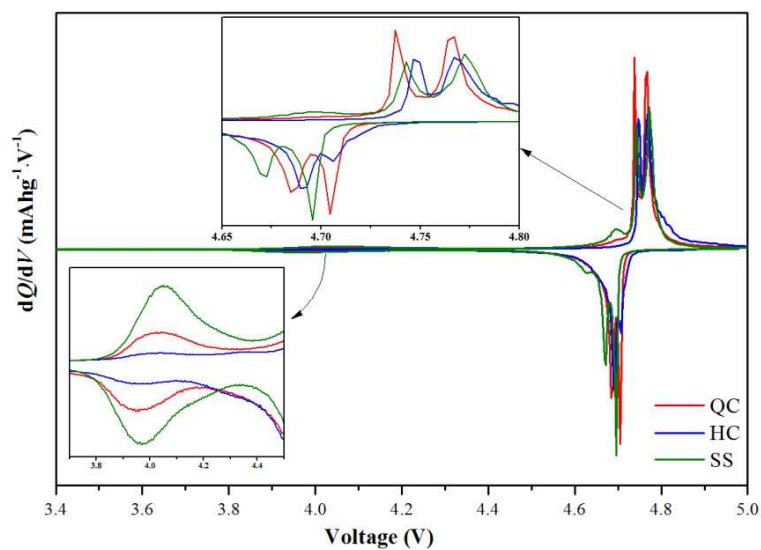

Figure S1 Differential capacity vs. voltage curves of samples QC, HC, SS

Table S1 Polarization potential differences of redox reaction at around 4.7 V

| Sample | Higher plateau          |                         |                 | Lower plateau           |                         |                 |
|--------|-------------------------|-------------------------|-----------------|-------------------------|-------------------------|-----------------|
|        | Oxidation Potential / V | Reduction Potential / V | Difference / mV | Oxidation Potential / V | Reduction Potential / V | Difference / mV |
| SS     | 4.743                   | 4.673                   | 70.45           | 4.772                   | 4.696                   | 76.67           |
| HC     | 4.746                   | 4.690                   | 56.78           | 4.767                   | 4.706                   | 61.16           |
| QC     | 4.737                   | 4.685                   | 52.77           | 4.767                   | 4.705                   | 62.63           |
